# Supplementary material for: One-Pot Cu/TiO2 Nanoparticles Synthesis for Trans-Ferulic Acid Conversion into Vanillin
Source: PubMed Central journal article supplement (PMC6864876; doi:10.3390/molecules24213985), 2019-11-04
Supplement: molecules-24-03985-s001.pdf [file molecules-24-03985-s001.pdf]

# One-Pot Cu/TiO<sub>2</sub> Nanoparticles Synthesis for Trans-Ferulic Acid Conversion into Vanillin

*Paulette Gómez-López<sup>1</sup>, Noelia Lázaro<sup>1</sup>, Antonio Romero<sup>1</sup>, C.G. Alvarado-Beltrán<sup>2\*</sup>, Antonio Pineda<sup>1</sup>, Alina M. Balu<sup>1</sup> and Rafael Luque,<sup>1,3\*</sup>*

<sup>1</sup> Grupo FQM-383, Departamento de Química Orgánica, Universidad de Córdoba, Córdoba, Spain

<sup>2</sup> Facultad de Ingeniería Mochis, Universidad Autónoma de Sinaloa, Fuente de Poseidón y Prol. Angel Flores, S.N., 81223, Los Mochis Sin., México

<sup>3</sup> Scientific Center for Molecular Design and Synthesis of Innovative Compounds for the Medical Industry, People's Friendship University of Russia (RUDN University), Moscow, Russia

Rafael Luque: [g62alsor@uco.es](mailto:g62alsor@uco.es), Clemente G. Alvarado Beltrán: [calvarado@uas.mx](mailto:calvarado@uas.mx)

In this study, the co-synthesis of TiO<sub>2</sub> and Cu metallic nanoparticles obtained via one pot cost-efficient hydrothermal process has been addressed. The different nanocatalysts with different Cu content were characterized by X-ray diffraction, nitrogen porosimetry, scanning electron microscopy and transmission electron microscopy. The TiO<sub>2</sub> and Cu metallic nanoparticles were synthesized with a copper loading up to 1 (Cu/Ti atomic ratio). The synthesized catalysts present pore size in the mesoporous range and high surface areas above 150 m<sup>2</sup>/g. The particles size for TiO<sub>2</sub> present homogeneous distribution around 8 nm, moreover, Cu nanoparticles varies from 12 to >100nm depending on the metal loading. The nanostructured materials were gratefully tested in the oxidation of trans-ferulic acid into vanillin under sustainable conditions. The materials were able to successfully convert the trans-ferulic acid into vanillin, achieving the best performance through the use of the TiO<sub>2</sub> catalyst with 0.3 Cu/Ti atomic ratio leading to a maximum vanillin yield of 70%.

**KEYWORDS:** one-pot synthesis; TiO<sub>2</sub>; Cu nanoparticles; vanillin; *trans-ferulic acid*; *heterogeneous catalysis*.

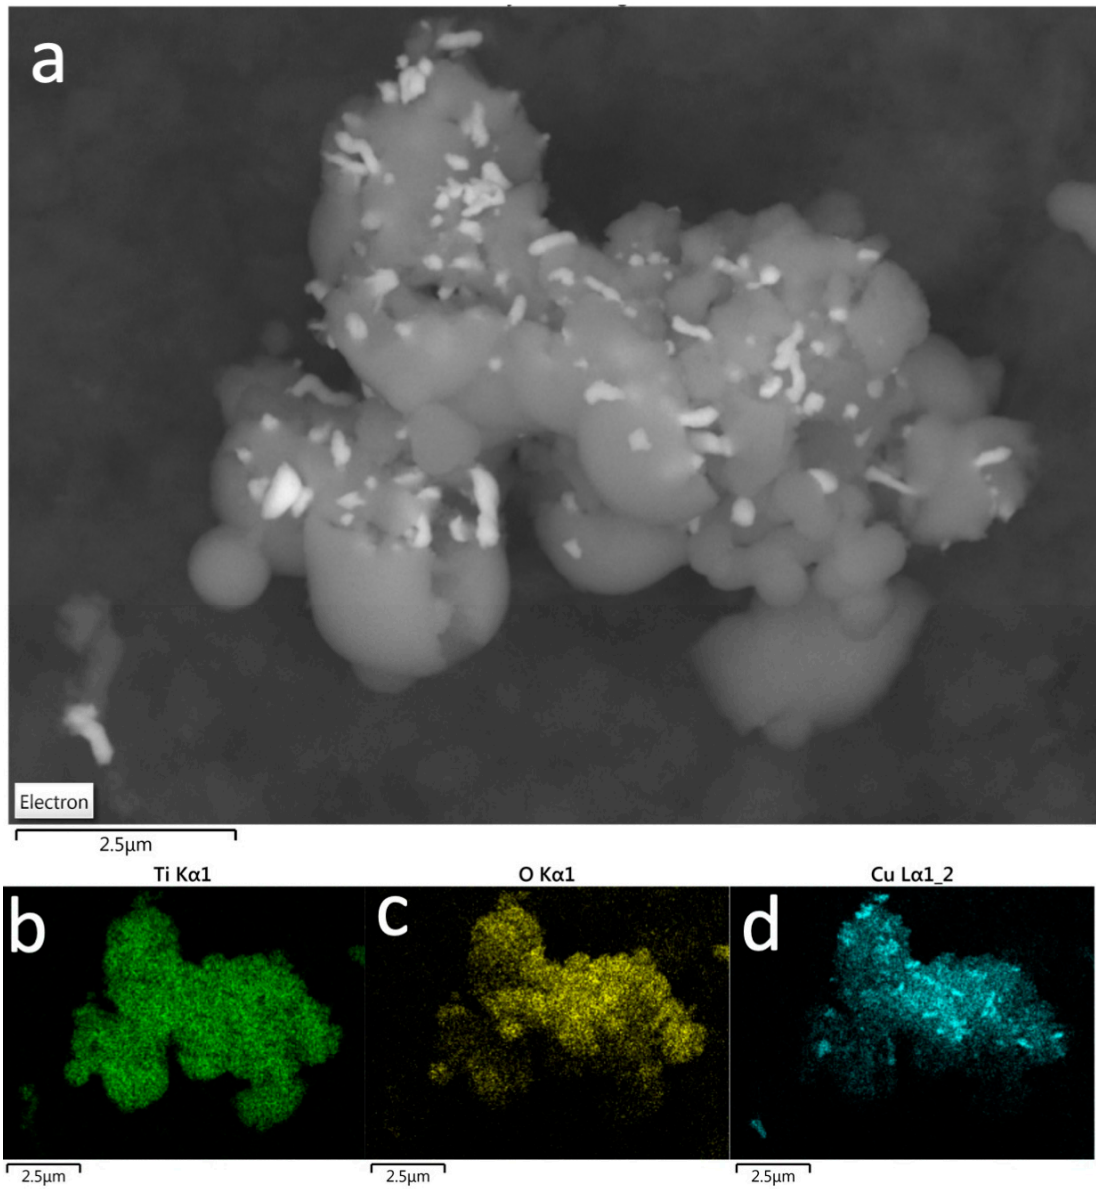

Figure S1. SEM micrograph of 0.5Cu/TiO<sub>2</sub> (a) and EDX-mapping (b) Ti, (c) O and (d) Cu

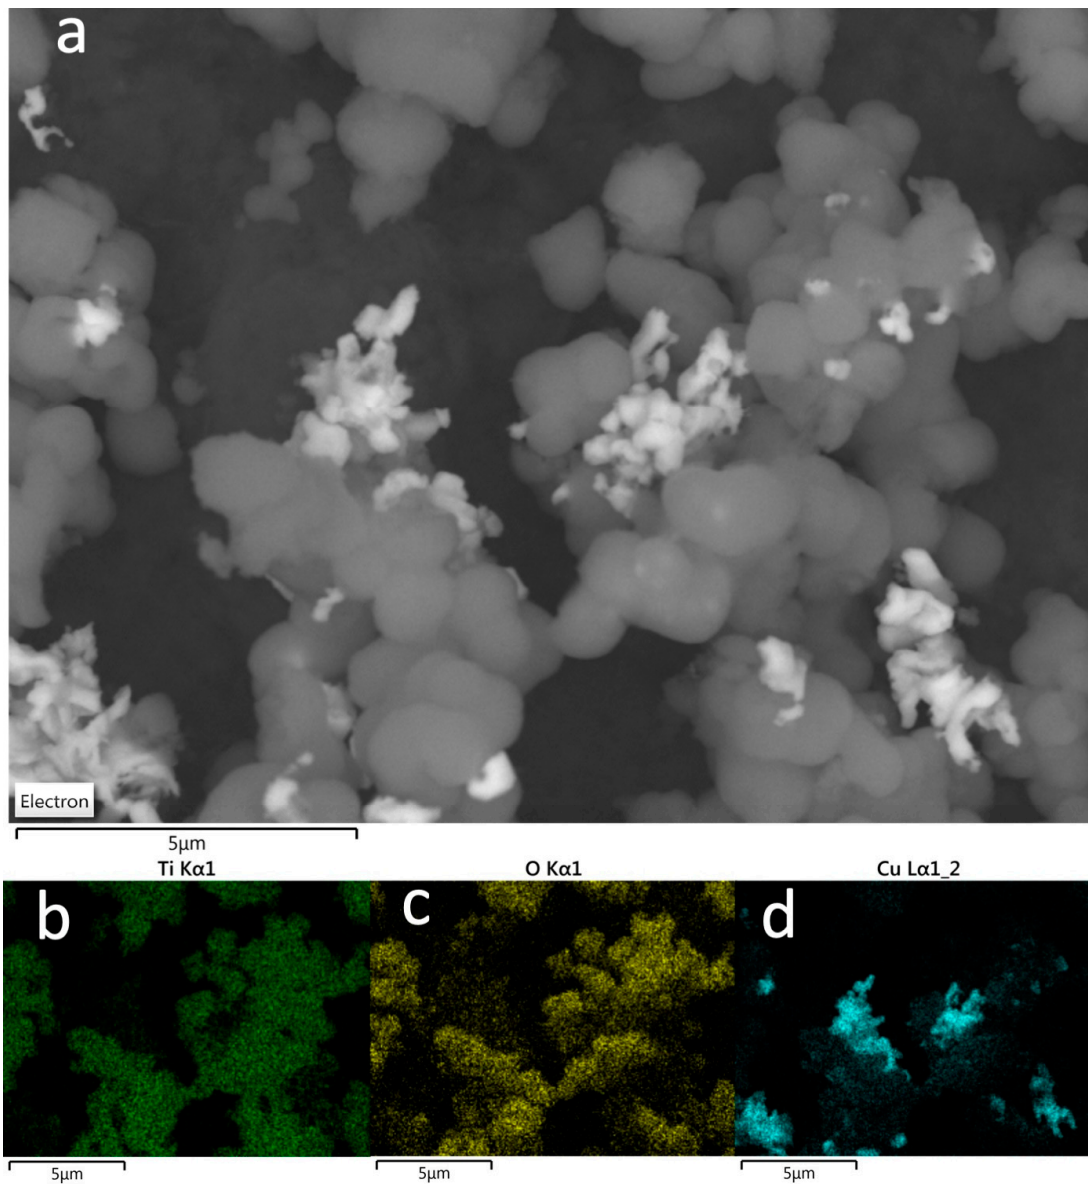

Figure S2. SEM micrograph of 1Cu/TiO<sub>2</sub> (a) and EDX-mapping (b) Ti, (c) O and (d) Cu

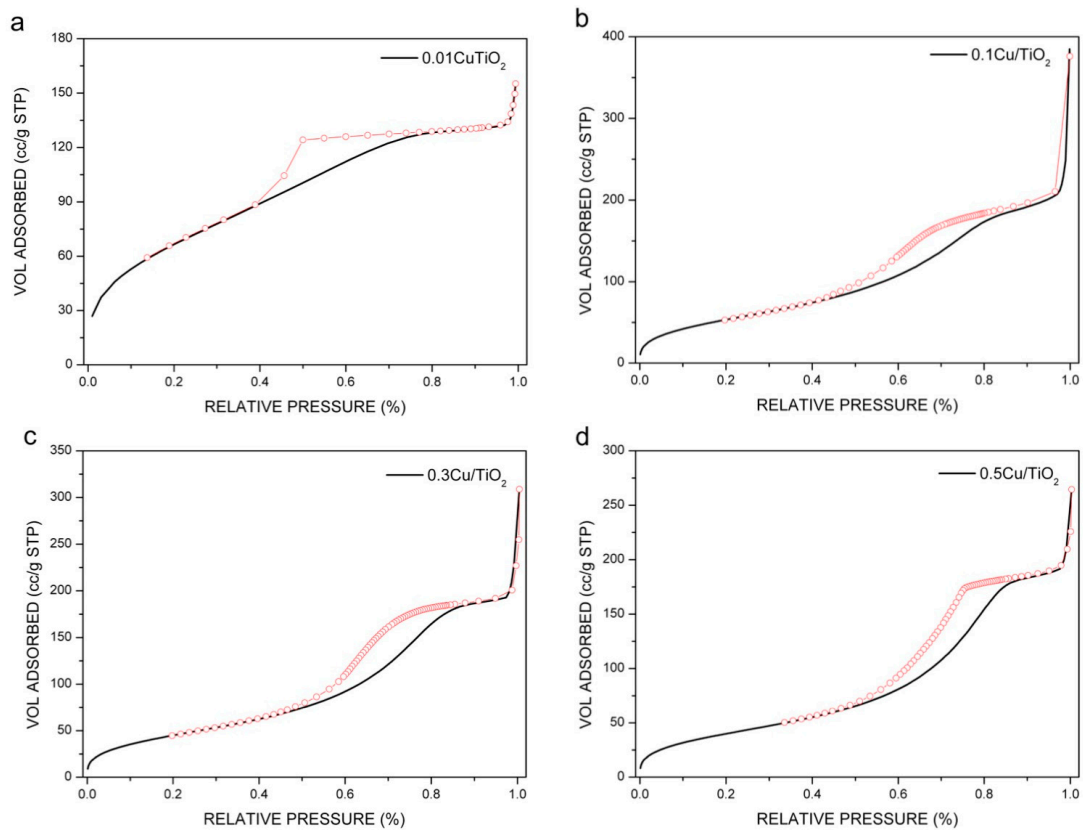

Figure S3.  $N_2$  adsorption-desorption isotherm for (a) 0.01, (b) 0.1, (c) 0.3 and (d) 0.5 of copper content in  $Cu/TiO_2$  samples.

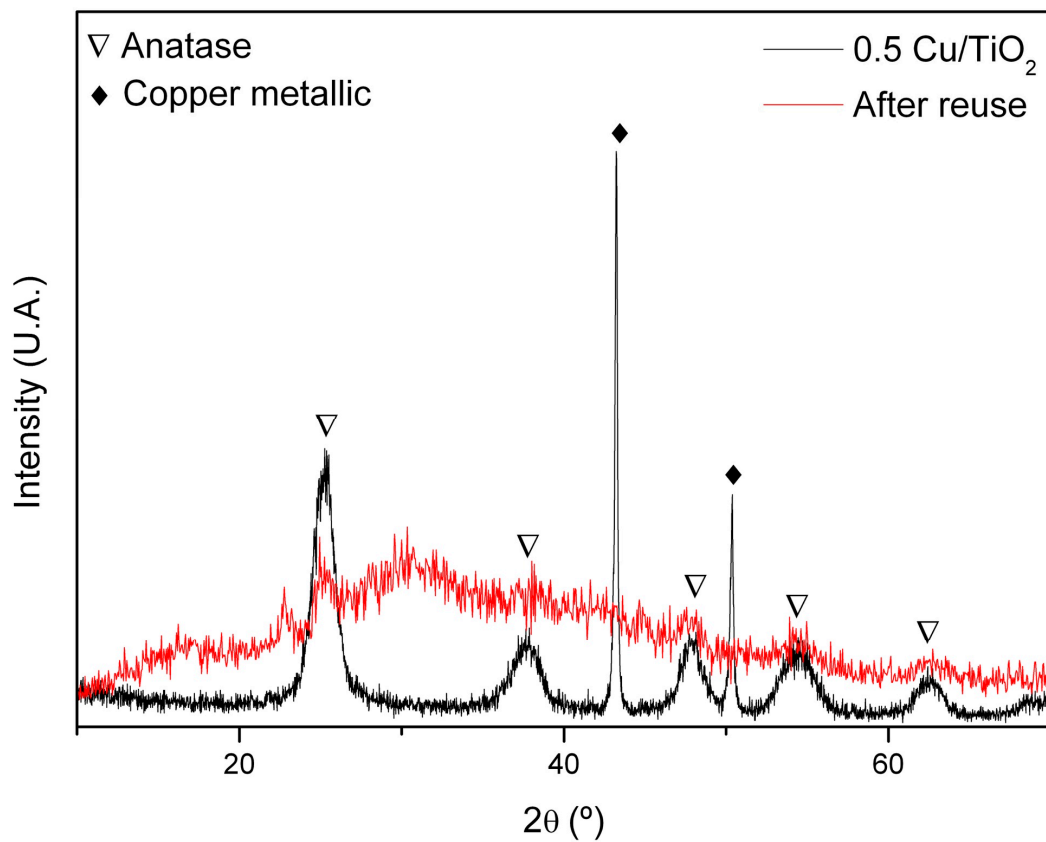

Figure S4. DRX pattern for 0.5CuTiO<sub>2</sub> catalyst before (black) and after reuses (red), the catalyst is identified as mixture of anatase structure (TiO<sub>2</sub>) and Copper metallic (Cu). After reuses the catalyst pattern is modified, is necessary to mention the catalyst recovery was very poor.
